# Supplementary material
Source: ML conference proceedings conference paper supplement (https://openaccess.thecvf.com/content/CVPR2024/html/Qian_Boosting_Diffusion_Models_CVPR_2024_paper.html)
Supplement: Supplementary file 1 [file Qian_Boosting_Diffusion_Models_CVPR_2024_supplemental.pdf]

# Boosting Diffusion Models with Moving Average Sampling in Frequency Domain — CVPR 2024 Supplementary Material\*

Yurui Qian<sup>†</sup>, Qi Cai<sup>‡</sup>, Yingwei Pan<sup>‡</sup>, Yehao Li<sup>‡</sup>, Ting Yao<sup>‡</sup>, Qibin Sun<sup>†</sup>, and Tao Mei<sup>‡</sup>

<sup>†</sup>University of Science and Technology of China    <sup>‡</sup>HiDream.ai Inc.

qyr123@mail.ustc.edu.cn, {cqcaiqi, pandy, liyehao, tiyao}@hidream.ai,  
qibinsun@ustc.edu.cn, tmei@hidream.ai

This supplementary material contains: 1) the Algorithm underlying our Moving Average Sampling in Frequency domain (MASF); 2) more experiments on ImageNet 64×64; 3) evolution of  $x_0^t$  with respect to  $t$ ; 4) visualization results.

## 1. Algorithm

We illustrate the algorithm of our MASF in Algorithm S.1.

---

### Algorithm S. 1 MASF

---

**Require:** initial value  $x_T \sim \mathcal{N}(\mathbf{0}, \mathbf{I})$ ,  $\tilde{x}_f^{T+1} = \mathbf{0}$ ,  $w_f^T = \mathbf{0}$ , ( $f \in \{ll, lh, hl, hh\}$ ), variance schedule  $\alpha_t$  ( $t \in \{1, 2, \dots, T\}$ ),  $\bar{\alpha}_t = \prod_{i=1}^t \alpha_i$ , denoising network  $\epsilon_\theta(\cdot)$ , solver Solver.

MASF hyperparameters:  $\gamma, \beta_f(t), w_f^t$ .

Denote Discrete Wavelet Transformation as DWT, Inverse DWT as IDWT and element-wise multiplication as  $\circ$ .

**for**  $t = T$  **to** 1 **do**

$$x_0^t = (x_t - \sqrt{1 - \bar{\alpha}_t} \epsilon_\theta(x_t, t)) / \sqrt{\bar{\alpha}_t}$$

$$x_{ll}^t, x_{lh}^t, x_{hl}^t, x_{hh}^t \leftarrow \text{DWT}(x_0^t)$$

**for**  $f$  **in**  $\{ll, lh, hl, hh\}$  **do**

$$\tilde{x}_f^t \leftarrow (\mathbf{1} - \gamma w_f^t) \circ x_f^t + \gamma w_f^t \circ \tilde{x}_f^{t+1}$$

**end for**

$$\tilde{x}_0^t \leftarrow \text{IDWT}(\beta_{ll}(t) \tilde{x}_{ll}^t, \beta_{lh}(t) \tilde{x}_{lh}^t, \beta_{hl}(t) \tilde{x}_{hl}^t, \beta_{hh}(t) \tilde{x}_{hh}^t)$$

$$x_{t-1} \leftarrow \text{Solver}(x_t, \tilde{x}_0^t, t)$$

**end for**

**return:**  $x_0$

---

## 2. More Experiments on ImageNet 64×64

In this section, we further evaluate our MASF by leveraging three pre-trained models on ImageNet 64×64 dataset in Table S.1 using FID with 50K samples. Generally, applying MASF can boost performances across different models (continuous time and discrete time) and various backbone architectures.

\*This work was performed at HiDream.ai.

## 3. Evolution of $x_0^t$ with respect to $t$

To validate the efficacy of our MASF on stabilizing denoising process, we further plot the evolution of  $x_0^t$  with respect to timestep  $t$  before (Baseline) and after applying MASF. Figure S.1 demonstrates that applying MASF can reduce oscillation and lead to a more stable denoising trajectory.

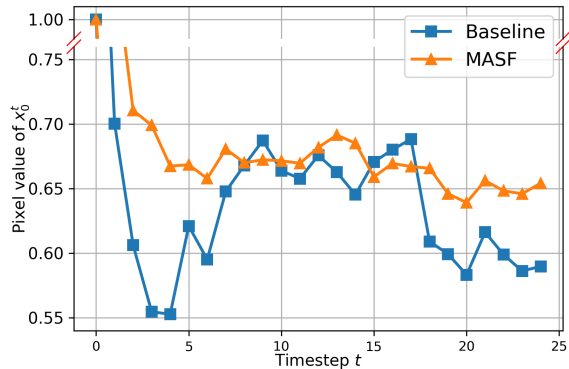

Figure S. 1. We utilize a diffusion model from ADM pre-trained on ImageNet-64 to sample from pure noise and capture the intermediate output as denoised sample  $x_t$ . We calculate  $x_0^t$  with the noise and  $x_t$ . Subsequently, we plot the pixel value of  $x_0^t$  with respect to generative timesteps  $t$  from Baseline and our MASF, respectively.

## 4. Visualization Results

For a more comprehensive qualitative validation of our MASF, we present additional generated images from the ImageNet 256×256 dataset in Figure S.2.

Table S. 1. FID comparisons of 50K samples with different settings on ImageNet  $64\times 64$ .

| Model | Sampler          | NFE          |             |             |             |
|-------|------------------|--------------|-------------|-------------|-------------|
|       |                  | 10           | 15          | 20          | 25          |
| EDM   | Heun             | 33.39        | 6.12        | 4.51        | 3.69        |
| EDM   | +MASF            | <b>27.75</b> | <b>5.62</b> | <b>4.12</b> | <b>3.47</b> |
| U-ViT | DPM-Solver++(3M) | 43.71        | 5.31        | 4.41        | 4.32        |
| U-ViT | +MASF            | <b>29.81</b> | <b>4.93</b> | <b>4.20</b> | <b>3.99</b> |
| ADM   | DPM-Solver++(2M) | 7.34         | 4.48        | 3.75        | 3.49        |
| ADM   | +MASF            | <b>6.90</b>  | <b>4.38</b> | <b>3.58</b> | <b>3.28</b> |

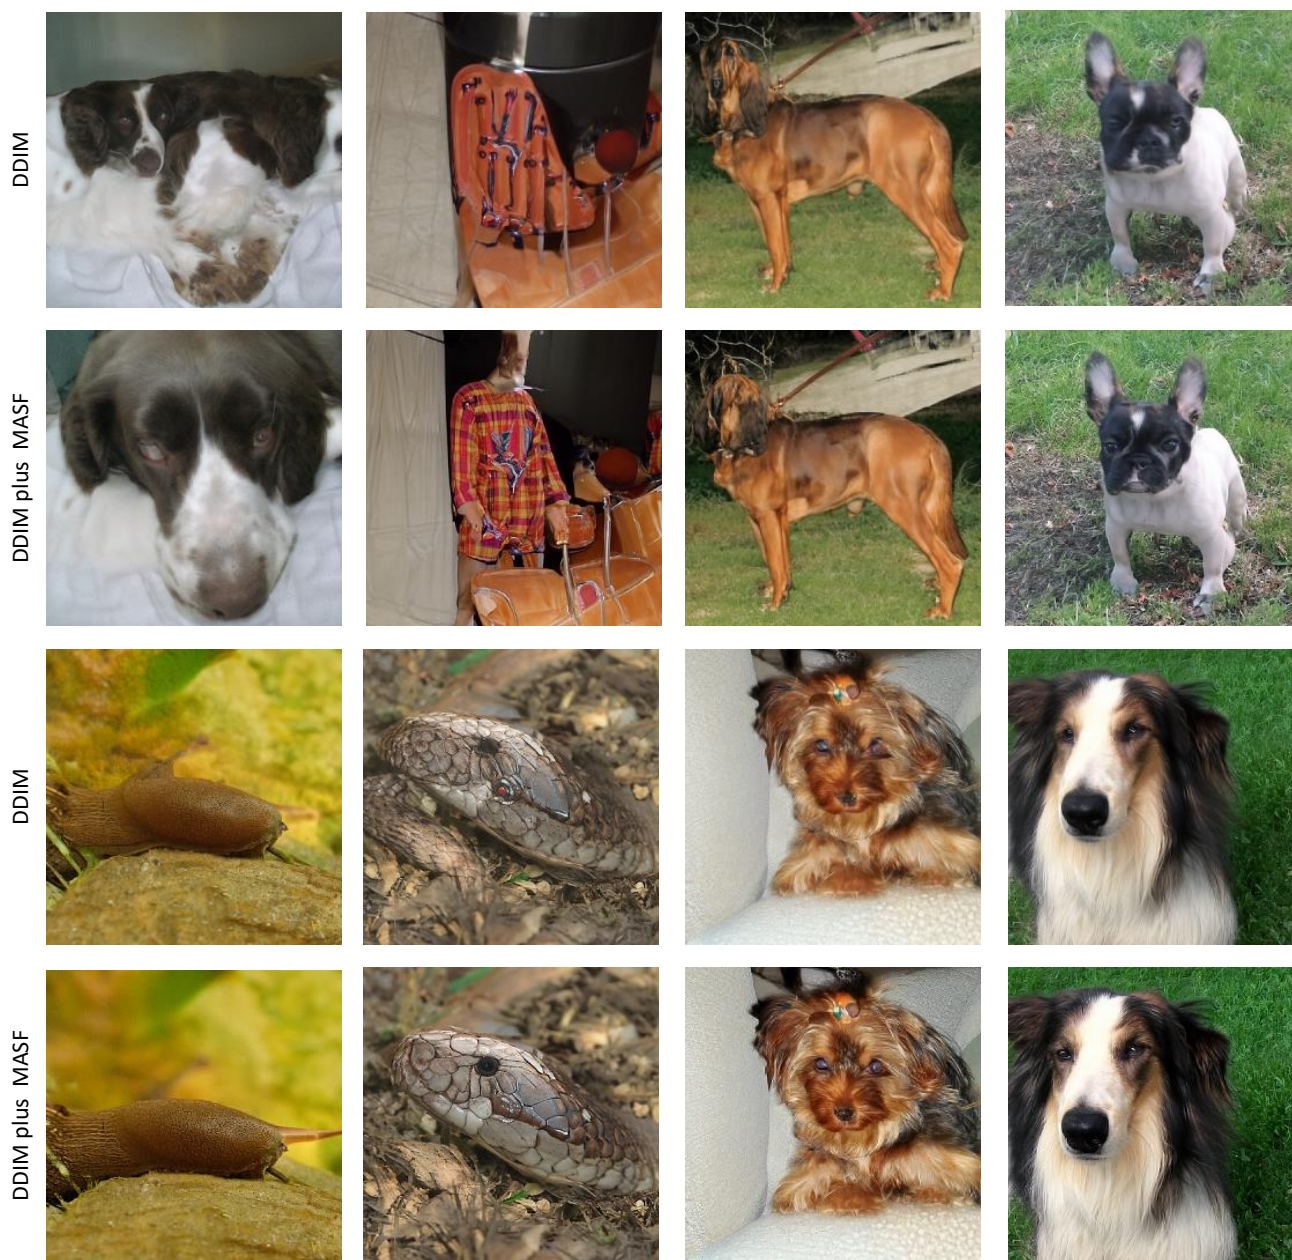

Figure S. 2. The generated images on ImageNet  $256\times 256$  by using DDIM and DDIM plus MASF with 25 NFE (number of function evaluations).
